# Supplementary material
Source: HighWire-hosted journal article supplement (https://bmjopen.bmj.com/content/14/4/e080258)
Supplement: inline-supplementary-material-6 [file inline-supplementary-material-6.pdf]

**Appendix 3: Pooled (random effects) recruitment and attrition rates for studies with attrition > 0% and recruitment < 100%.**

|                     | Group                        | Rate (%) | 95% Confidence Interval |           | P     |
|---------------------|------------------------------|----------|-------------------------|-----------|-------|
|                     |                              |          | Lower (%)               | Upper (%) |       |
| Recruitment         | Placebo control (n=36)       | 68.7     | 59.3                    | 78.1      | 0.562 |
|                     | Non-operative control (n=21) | 74.1     | 58.6                    | 89.5      |       |
| Attrition (Overall) | Placebo control (n= 54)      | 21.2     | 17.2                    | 25.2      | 0.811 |
|                     | Non-operative control (n=34) | 23.7     | 18.8                    | 28.6      |       |
| Cross-over          | Placebo control (n= 54)      | 8.8      | 6.3                     | 11.4      | 0.174 |
|                     | Non-operative control (n=34) | 11.8     | 8.4                     | 15.2      |       |
| Drop-out            | Placebo control (n= 54)      |          |                         |           |       |
|                     | Non-operative control (n=34) |          |                         |           |       |
| Follow-up           | Placebo control (n= 54)      | 10.6     | 8.2                     | 13.0      | 0.084 |
|                     | Non-operative control (n=34) | 7.8      | 5.8                     | 9.8       |       |
